# Supplementary material for: Oxidative Stress, Folate Receptor Autoimmunity, and CSF Findings in Severe Infantile Autism
Source: Autism Res Treat. 2020 Nov 18;2020:9095284. doi: 10.1155/2020/9095284 (PMC7688371; doi:10.1155/2020/9095284)
Supplement: Supplementary Materials — Supplement 1: methods for determination of oxidative stress and pro- and antioxidants. Supplement 2: the treatment protocol based upon abnormal biochemical findings and FR autoantibodies. [file 9095284.f1.zip]

Archive with 2 entries (2 files):
- 9095284.f1/Supplement I-ART.docx
- 9095284.f1/Supplement II_ART.docx
